# Supplementary material
Source: publisher figshare collection journal article supplement (https://acs.figshare.com/ndownloader/files/4857637)
Supplement: Supplementary file 1 [file 4857637]

## Supporting Information

# Synthesis and Stereospecific Polymerization of a Novel Bulky Styrene Derivative

Rong Wang,<sup>1</sup> Dongtao Liu<sup>2</sup>, Xiaohong Li,<sup>3</sup> Jie Zhang,<sup>1</sup> Dongmei Cui,<sup>3\*</sup> and Xinhua

Wan<sup>1\*</sup>

<sup>1</sup>Beijing National Laboratory for Molecular Sciences, Key Laboratory of Polymer Chemistry and Physics of Ministry of Education, College of Chemistry and Molecular Engineering, Peking University, Beijing 100871, China. <sup>2</sup>State Key Laboratory of Polymer Physics and Chemistry, Changchun Institute of Applied Chemistry, Chinese Academy of Sciences, Changchun 130022, China. <sup>3</sup>Jiangsu Key Laboratory of Advanced Functional Polymer Design and Application, Department of Polymer Science and Engineering, College of Chemistry, Chemical Engineering and Materials Science, Soochow University, Suzhou 215123, China

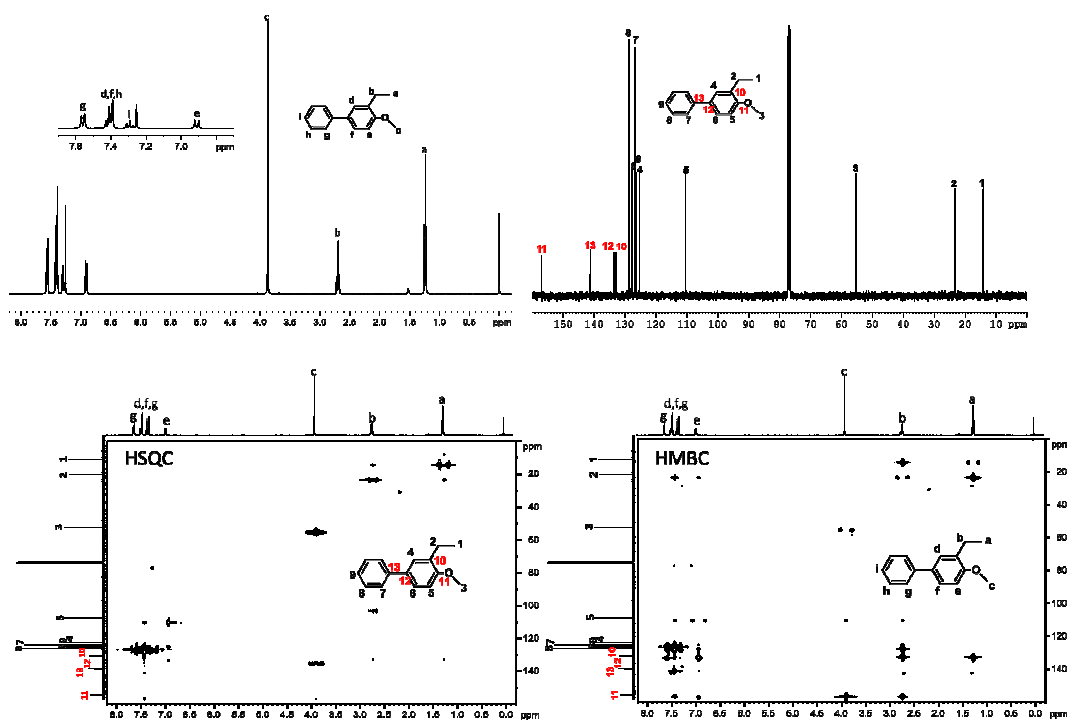

Fig. S1 <sup>1</sup>H/<sup>13</sup>C NMR, HSQC and HMBC spectra of model compound measured in CDCl<sub>3</sub> at 25 °C

**Table S1** Chemical shifts (ppm) of monomer, model compound, and P4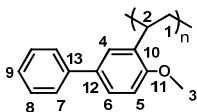

|                | C1    | C2    | C3   | C4    | C5    | C6    | C7    | C8    | C9    | C10   | C11   | C12   | C13   |
|----------------|-------|-------|------|-------|-------|-------|-------|-------|-------|-------|-------|-------|-------|
| Monomer        | 111.3 | 131.9 | 55.8 | 125.6 | 115.1 | 127.7 | 127.1 | 128.9 | 127.0 | 126.9 | 156.5 | 133.9 | 141.1 |
| Model compound | 14.4  | 23.6  | 55.6 | 125.5 | 110.6 | 128.1 | 127.0 | 128.8 | 126.7 | 133.1 | 157.2 | 133.7 | 141.4 |
| Polymer        | 41.5  | 31.6  | 55.2 | 124.7 | 110.6 | 127.1 | 127.1 | 126.5 | 124.7 | 135.5 | 157.2 | 133.0 | 142.1 |

**Table S2**  $^{13}\text{C}$  Chemical shifts (ppm) of ring substituted styrenes and their polymers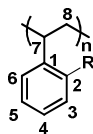

|                           | C1    | C2    | C3    | C4    | C5    | C6    | C7    | C8    |
|---------------------------|-------|-------|-------|-------|-------|-------|-------|-------|
| St                        | 137.6 | 126.3 | 128.5 | 127.8 | 128.5 | 126.3 | 136.9 | 113.7 |
| PSt                       | 146.4 | 128.2 | 127.5 | 125.7 | 127.5 | 128.2 | 40.7  | 43.1  |
| <i>o</i> -Methyl-St       | 136.9 | 135.3 | 130.3 | 127.7 | 125.4 | 126.1 | 134.9 | 115.0 |
| P( <i>o</i> -Methyl-St)   | 144.5 | 135.3 | 130.1 | 125.9 | 125.4 | 126.0 | 34.5  | 43.3  |
| <i>o</i> -Methoxyl-St     | 126.8 | 156.8 | 114.3 | 128.8 | 120.7 | 126.6 | 131.8 | 110.9 |
| P( <i>o</i> -Methoxyl-St) | 135.5 | 157.3 | 110.1 | 128.3 | 119.8 | 125.6 | 33.9  | 40.8  |

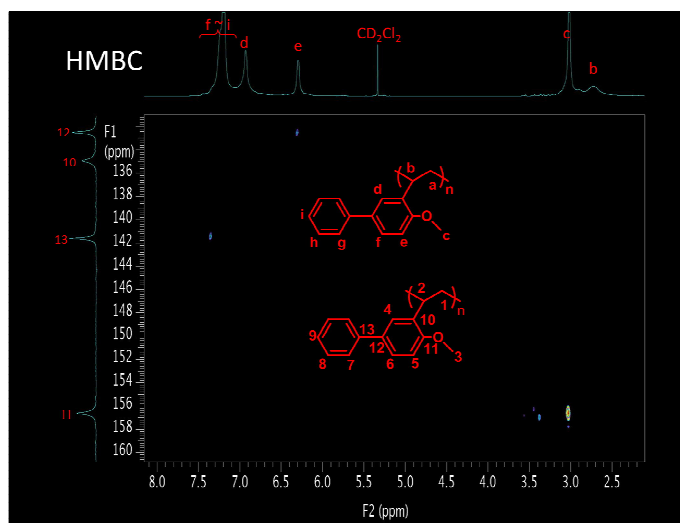

**Fig. S2** HMBC spectrum of **P4** measured in  $\text{CD}_2\text{Cl}_2$  at  $25^\circ\text{C}$

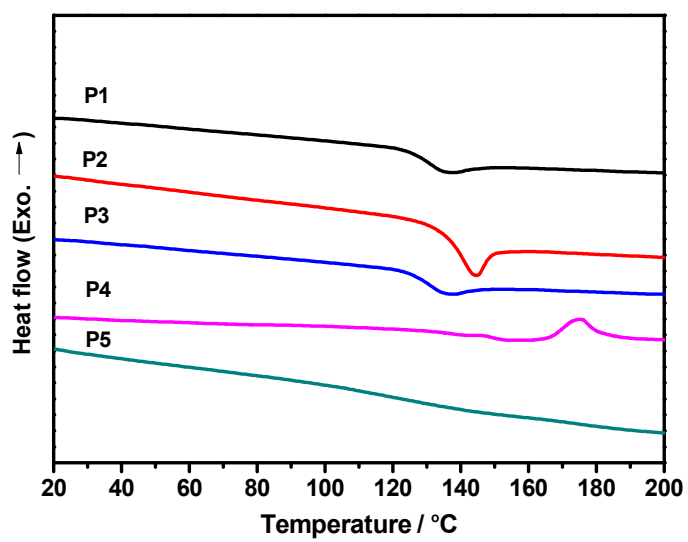

**Fig. S4** DSC curves of the polymers as prepared
